# Supplementary material for: CK2α, over-expressed in human malignant pleural mesothelioma, regulates the Hedgehog signaling pathway in mesothelioma cells
Source: Springer Nature journal article supplement (doi:10.1186/s13046-014-0093-6), 2014-11-25

## Supplementary Table

Table 1: Comparison of IHC analysis of CK2 $\alpha$ , CK2 $\beta$ , Gli1 expression in mesothelioma tumors

|                    | CK2 $\alpha$ -/+ |              | CK2 $\alpha$ ++/+++ |               | total N      |
|--------------------|------------------|--------------|---------------------|---------------|--------------|
|                    | Gli1 -/+         | Gli1 ++/+++  | Gli1 -/+            | Gli1 ++/+++   |              |
| CK2 $\beta$ -/+    | 31.8% (7/22)     | 18.2% (4/22) | 22.7% (5/22)        | 27.3% (6/22)  | 100% (22/22) |
| CK2 $\beta$ ++/+++ | 17.9% (7/39)     | 5.1% (2/39)  | 28.2% (11/39)       | 48.7% (19/39) | 100% (39/39) |

Table 2: Association analysis of CK2 $\alpha$  and Gli1 expression in mesothelioma tumors ( $p < 0.05$ , Chi-square)

|                     | Gli1 -/+ | Gli1 ++/+++ |
|---------------------|----------|-------------|
| CK2 $\alpha$ -/+    | 14       | 6           |
| CK2 $\alpha$ ++/+++ | 16       | 25          |

Table 3: Association analysis of CK2 $\alpha$  and CK2 $\beta$  expression in mesothelioma tumors ( $p < 0.05$ , Chi-square)

|                     | CK2 $\beta$ -/+ | CK2 $\beta$ ++/+++ |
|---------------------|-----------------|--------------------|
| CK2 $\alpha$ -/+    | 11              | 9                  |
| CK2 $\alpha$ ++/+++ | 11              | 30                 |

Table 4: Association analysis of CK2 $\beta$  and Gli1 expression in mesothelioma tumors ( $p > 0.05$ , Chi-square)

|             | CK2 $\beta$ -/+ | CK2 $\beta$ ++/+++ |
|-------------|-----------------|--------------------|
| Gli1 -/+    | 12              | 18                 |
| Gli1 ++/+++ | 10              | 21                 |

# Supplementary Figure 1

A

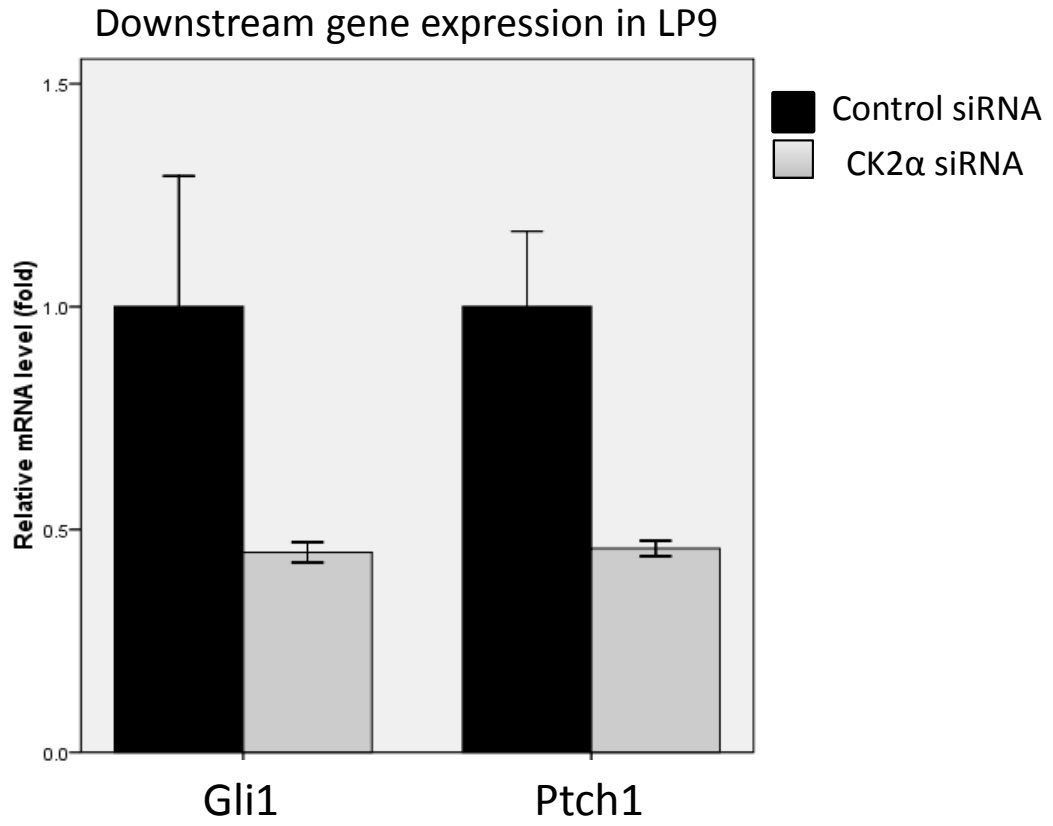

B

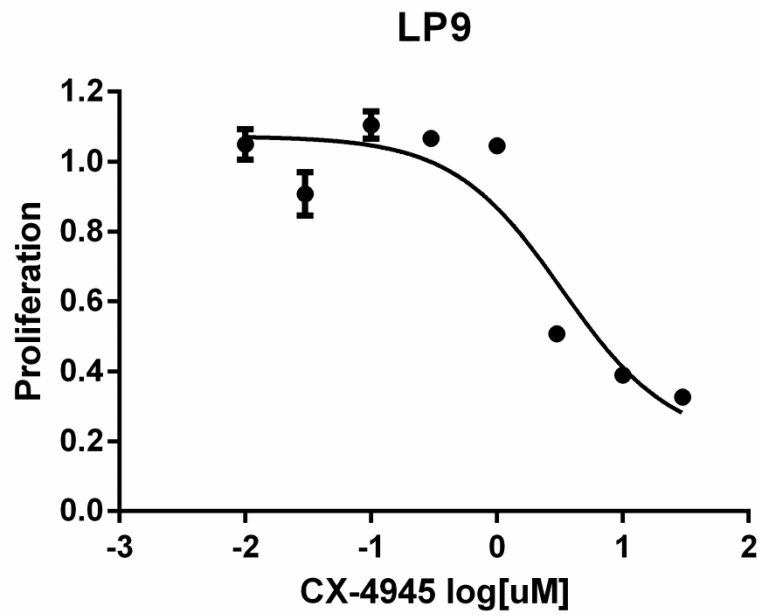

Supplement: MOESM1 [file 9777746]
